# Supplementary material for: Patient experiences of co-designed rehabilitation interventions: protocol for a rapid review
Source: PubMed Central journal article supplement — BMJ Open. 2022 Jan 31;12(1):e056927. doi: 10.1136/bmjopen-2021-056927 (PMC8808383; doi:10.1136/bmjopen-2021-056927), 2022-01-31
Supplement: bmjopen-2021-056927supp001.pdf [file bmjopen-2021-056927supp001.pdf]

## Draft of Medline Search Strategy

(with example interim results)

Database(s): Ovid MEDLINE(R) ALL

| Search ID# | Search Terms                                                                         | Search Notes                              | Results |
|------------|--------------------------------------------------------------------------------------|-------------------------------------------|---------|
| 1          | (co-design* or codesign*).mp.                                                        |                                           | 1614    |
| 2          | (co-product* or coproduc*).mp.                                                       |                                           | 5418    |
| 3          | (codevise* or cocreate* or co-create* or co-invent* or cogenerate* or co-found*).mp. |                                           | 914     |
| 4          | participatory design*.mp.                                                            |                                           | 623     |
| 5          | collaborative design*.mp.                                                            |                                           | 138     |
| 6          | ("Experience based" adj2 design*).mp.                                                |                                           | 99      |
| 7          | Decision Making, Shared/                                                             |                                           | 1005    |
| 8          | (share* adj2 "decision making").mp.                                                  |                                           | 10869   |
| 9          | or/1-8                                                                               |                                           | 19259   |
| 10         | patient engagement.mp.                                                               |                                           | 3550    |
| 11         | patient involvement.mp.                                                              |                                           | 2896    |
| 12         | patient consultation.mp.                                                             |                                           | 560     |
| 13         | Patient Participation/                                                               |                                           | 27250   |
| 14         | patient participation.mp.                                                            |                                           | 29017   |
| 15         | patient input*.mp.                                                                   |                                           | 419     |
| 16         | Stakeholder Participation/                                                           |                                           | 1578    |
| 17         | stakeholder participation.mp.                                                        |                                           | 1906    |
| 18         | consumer engagement.mp.                                                              |                                           | 253     |
| 19         | consumer involvement.mp.                                                             |                                           | 357     |
| 20         | consumer participation.mp.                                                           |                                           | 414     |
| 21         | consumer input.mp.                                                                   |                                           | 99      |
| 22         | or/10-21                                                                             |                                           | 36540   |
| 23         | design*.mp.                                                                          |                                           | 2282168 |
| 24         | 22 and 23                                                                            | more general co-design terms AND "design" | 7842    |
| 25         | 9 or 24                                                                              | Co-design terms                           | 26095   |
| 26         | exp Hospitals/                                                                       |                                           | 287515  |
| 27         | hospital*.tw.                                                                        |                                           | 1381782 |

|    |                                                                                                             |                |         |
|----|-------------------------------------------------------------------------------------------------------------|----------------|---------|
| 28 | Critical Care/                                                                                              |                | 55257   |
| 29 | Inpatients/                                                                                                 |                | 24172   |
| 30 | inpatient*.mp.                                                                                              |                | 128467  |
| 31 | Hospitalization/                                                                                            |                | 117596  |
| 32 | hospitali?ation.mp.                                                                                         |                | 234243  |
| 33 | exp Hospital Units/                                                                                         |                | 119558  |
| 34 | ward*.tw,kw.                                                                                                |                | 64380   |
| 35 | ((acute or subacute or sub-acute) adj3 (clinic* or care or department* or unit* or centre* or center*)).mp. |                | 60190   |
| 36 | Subacute Care/                                                                                              |                | 1211    |
| 37 | or/26-36                                                                                                    | Hospital terms | 1722776 |
| 38 | (patient* adj2 (experience* or perception* or belief* or believe* or participat*)).mp.                      |                | 170925  |
| 39 | (consumer* adj2 (experience* or perception* or belief* or believe* or participat*)).mp.                     |                | 2655    |
| 40 | lived experience*.mp.                                                                                       |                | 7501    |
| 41 | 38 or 39 or 40                                                                                              | Outcomes terms | 180025  |
| 42 | 25 and 37 and 41                                                                                            |                | 1790    |
| 43 | limit 42 to (english language and yr="2000 -Current")                                                       |                | 1592    |

NOTE: [mp=title, abstract, original title, name of substance word, subject heading word, floating sub-heading word, keyword heading word, organism supplementary concept word, protocol supplementary concept word, rare disease supplementary concept word, unique identifier, synonyms]

## Draft of Embase Search Strategy

(with example interim results)

Database(s): **Embase Classic+Embase**

| Search ID# | Search Terms                                                                         | Search Notes | Results |
|------------|--------------------------------------------------------------------------------------|--------------|---------|
| 1          | (co-design* or codesign*).mp.                                                        |              | 2011    |
| 2          | (co-produc* or coproduc*).mp.                                                        |              | 6311    |
| 3          | (codevise* or cocreate* or co-create* or co-invent* or cogenerate* or co-found*).mp. |              | 1316    |
| 4          | participatory design*.mp.                                                            |              | 658     |
| 5          | collaborative design*.mp.                                                            |              | 185     |
| 6          | ("Experience based" adj2 design*).mp.                                                |              | 156     |
| 7          | shared decision making/                                                              |              | 9161    |
| 8          | (share* adj2 "decision making").mp.                                                  |              | 17648   |
| 9          | or/1-8                                                                               |              | 27744   |
| 10         | patient engagement.mp.                                                               |              | 5154    |
| 11         | patient involvement.mp.                                                              |              | 4006    |
| 12         | patient consultation.mp.                                                             |              | 905     |
| 13         | patient participation/                                                               |              | 29537   |
| 14         | patient participation.mp.                                                            |              | 31308   |
| 15         | patient input*.mp.                                                                   |              | 882     |
| 16         | stakeholder engagement/                                                              |              | 3763    |
| 17         | stakeholder participation.mp.                                                        |              | 424     |
| 18         | consumer engagement.mp.                                                              |              | 377     |
| 19         | consumer involvement.mp.                                                             |              | 521     |
| 20         | consumer participation.mp.                                                           |              | 674     |
| 21         | consumer input.mp.                                                                   |              | 158     |
| 22         | or/10-21                                                                             |              | 43839   |
| 23         | design*.mp.                                                                          |              | 2618705 |
| 24         | 22 and 23                                                                            |              | 8921    |
| 25         | 9 or 24                                                                              |              | 35753   |
| 26         | exp hospital/                                                                        |              | 1309237 |
| 27         | hospital*.tw.                                                                        |              | 2200888 |
| 28         | intensive care/                                                                      |              | 131889  |
| 29         | hospital patient/                                                                    |              | 194627  |

|    |                                                                                                             |  |         |
|----|-------------------------------------------------------------------------------------------------------------|--|---------|
| 30 | inpatient*.mp.                                                                                              |  | 201483  |
| 31 | hospitalization/                                                                                            |  | 424891  |
| 32 | hospitali?ation.mp.                                                                                         |  | 527240  |
| 33 | exp "hospital subdivisions and components"/                                                                 |  | 631311  |
| 34 | ward*.tw,kw.                                                                                                |  | 104585  |
| 35 | ((acute or subacute or sub-acute) adj3 (clinic* or care or department* or unit* or centre* or center*)),mp. |  | 90253   |
| 36 | subacute care/                                                                                              |  | 1177    |
| 37 | or/26-36                                                                                                    |  | 3091932 |
| 38 | (patient* adj2 (experience* or perception* or belief* or believe* or participat*)),mp.                      |  | 265842  |
| 39 | (consumer* adj2 (experience* or perception* or belief* or believe* or participat*)),mp.                     |  | 3293    |
| 40 | lived experience*.mp.                                                                                       |  | 9078    |
| 41 | 38 or 39 or 40                                                                                              |  | 276832  |
| 42 | 25 and 37 and 41                                                                                            |  | 2366    |
| 43 | limit 42 to (english language and yr="2000 -Current")                                                       |  | 2255    |

NOTE: [mp=title, abstract, heading word, drug trade name, original title, device manufacturer, drug manufacturer, device trade name, keyword, floating subheading word, candidate term word]

## Draft of CINAHL Search Strategy

(with example interim results)

| Search ID# | Search Terms                                                                     | Search Notes | Results |
|------------|----------------------------------------------------------------------------------|--------------|---------|
| S1         | co-design* or codesign*                                                          |              | 948     |
| S2         | co-produc* or coproduc*                                                          |              | 1,084   |
| S3         | codevise* or cocreate* or co-create* or co-invent* or cogenerate* or co-found*   |              | 1,026   |
| S4         | "participatory design**"                                                         |              | 330     |
| S5         | "collaborative design**"                                                         |              | 81      |
| S6         | "Experience based" N2 design*                                                    |              | 79      |
| S7         | (MH "Decision Making, Shared")                                                   |              | 2,159   |
| S8         | share* N2 "decision making"                                                      |              | 7,201   |
| S9         | S1 OR S2 OR S3 OR S4 OR S5 OR S6 OR S7 OR S8                                     |              | 10,509  |
| S10        | "patient engagement"                                                             |              | 2,133   |
| S11        | "patient involvement"                                                            |              | 1,602   |
| S12        | "patient consultation"                                                           |              | 217     |
| S13        | "patient participation"                                                          |              | 1,532   |
| S14        | "patient input**"                                                                |              | 199     |
| S15        | (MH "Stakeholder Participation")                                                 |              | 1,435   |
| S16        | "stakeholder participation"                                                      |              | 1,527   |
| S17        | "consumer engagement"                                                            |              | 208     |
| S18        | "consumer involvement"                                                           |              | 228     |
| S19        | (MH "Consumer Participation")                                                    |              | 21,333  |
| S20        | "consumer participation"                                                         |              | 21,416  |
| S21        | "consumer input"                                                                 |              | 72      |
| S22        | S10 OR S11 OR S12 OR S13 OR S14 OR S15 OR S16 OR S17 OR S18 OR S19 OR S20 OR S21 |              | 26,691  |
| S23        | design*                                                                          |              | 871,880 |
| S24        | S22 AND S23                                                                      |              | 5,274   |
| S25        | S9 OR S24                                                                        |              | 15,237  |
| S26        | (MH "Hospitals+")                                                                |              | 122,030 |

|     |                                                                                                     |                                                                |         |
|-----|-----------------------------------------------------------------------------------------------------|----------------------------------------------------------------|---------|
| S27 | T1 hospital* OR AB hospital*                                                                        |                                                                | 484,543 |
| S28 | (MH "Critical Care")                                                                                |                                                                | 24,037  |
| S29 | (MH "Inpatients")                                                                                   |                                                                | 84,408  |
| S30 | inpatient*                                                                                          |                                                                | 123,011 |
| S31 | (MH "Hospitalization")                                                                              |                                                                | 39,453  |
| S32 | hospitalization or hospitalisation                                                                  |                                                                | 83,875  |
| S33 | (MH "Hospital Units+")                                                                              |                                                                | 101,055 |
| S34 | T1 ward* OR AB ward*                                                                                |                                                                | 29,373  |
| S35 | (acute or subacute or sub-acute) N3 (clinic* or care or department* or unit* or centre* or center*) |                                                                | 41,004  |
| S36 | (MH "Subacute Care")                                                                                |                                                                | 1,780   |
| S37 | S26 OR S27 OR S28 OR S29 OR S30 OR S31 OR S32 OR S33 OR S34 OR S35 OR S36                           |                                                                | 710,289 |
| S38 | patient* N2 (experience* or perception* or belief* or believe* or participat*)                      |                                                                | 72,462  |
| S39 | consumer* N2 (experience* or perception* or belief* or believe* or participat*)                     |                                                                | 22,773  |
| S40 | "lived experience"                                                                                  |                                                                | 5,252   |
| S41 | S38 OR S39 OR S40                                                                                   |                                                                | 97,797  |
| S42 | S25 AND S37 AND S41                                                                                 |                                                                | 1,177   |
| S43 | S25 AND S37 AND S41                                                                                 | Limiters - English Language; Published Date: 20000101-20211231 | 1,107   |

## Draft of Cochrane Search Strategy

(with example interim results)

| Search ID# | Search Terms                                                                   | Search Notes | Results |
|------------|--------------------------------------------------------------------------------|--------------|---------|
| #1         | co-design* OR codesign*                                                        |              | 194     |
| #2         | co-produc* or coproduc*                                                        |              | 120     |
| #3         | codevise* or cocreate* or co-create* or co-invent* or cogenerate* or co-found* |              | 119     |
| #4         | participatory NEXT design*                                                     |              | 47      |
| #5         | collaborative NEXT design*                                                     |              | 12      |
| #6         | Experience based NEAR/2 design                                                 |              | 12      |
| #7         | MeSH descriptor: [Decision Making, Shared] this term only                      |              | 36      |
| #8         | share* NEAR/2 "decision making"                                                |              | 1657    |
| #9         | {OR #1-#8}                                                                     |              | 2125    |
| #10        | patient engagement                                                             |              | 587     |
| #11        | patient involvement                                                            |              | 462     |
| #12        | patient consultation                                                           |              | 142     |
| #13        | MeSH descriptor: [Patient Participation] this term only                        |              | 1427    |
| #14        | patient participation                                                          |              | 2979    |
| #15        | patient NEXT input*                                                            |              | 56      |
| #16        | MeSH descriptor: [Stakeholder Participation] this term only                    |              | 19      |
| #17        | stakeholder participation                                                      |              | 31      |
| #18        | consumer engagement                                                            |              | 26      |
| #19        | consumer involvement                                                           |              | 75      |
| #20        | consumer participation                                                         |              | 150     |
| #21        | consumer input                                                                 |              | 31      |
| #22        | {OR #10-#21}                                                                   |              | 4107    |
| #23        | design*                                                                        |              | 295537  |
| #24        | #22 AND #23                                                                    |              | 1718    |
| #25        | #9 OR #24                                                                      |              | 3634    |
| #26        | MeSH descriptor: [Hospitals] explode all trees                                 |              | 3713    |
| #27        | hospital*:ti,ab                                                                |              | 170151  |
| #28        | MeSH descriptor: [Critical Care] this term only                                |              | 1773    |
| #29        | MeSH descriptor: [Inpatients] this term only                                   |              | 987     |

|     |                                                                                                         |                       |        |
|-----|---------------------------------------------------------------------------------------------------------|-----------------------|--------|
| #30 | inpatient*                                                                                              |                       | 21072  |
| #31 | MeSH descriptor: [Hospitalization] this term only                                                       |                       | 5397   |
| #32 | hospitalization OR hospitalisation                                                                      |                       | 44727  |
| #33 | MeSH descriptor: [Hospital Units] explode all trees                                                     |                       | 4254   |
| #34 | ward*:ti,ab,kw                                                                                          |                       | 13937  |
| #35 | (acute or subacute or sub-acute) NEAR/3 (clinic* or care or department* or unit* or centre* or center*) |                       | 8705   |
| #36 | MeSH descriptor: [Subacute Care] this term only                                                         |                       | 19     |
| #37 | {OR #26-#36}                                                                                            |                       | 199880 |
| #38 | patient* NEAR/2 (experience* or perception* or belief* or believe* or participat*)                      |                       | 32637  |
| #39 | consumer* NEAR/2 (experience* or perception* or belief* or believe* or participat*)                     |                       | 316    |
| #40 | lived NEXT experience*                                                                                  |                       | 237    |
| #41 | {OR #38-#40}                                                                                            |                       | 33076  |
| #42 | #25 AND #37 AND #41                                                                                     |                       | 499    |
|     |                                                                                                         | Central (Trials only) | 378    |
