# Supplementary material for: Patient experiences of co-designed rehabilitation interventions: protocol for a rapid review
Source: PubMed Central journal article supplement — BMJ Open. 2022 Jan 31;12(1):e056927. doi: 10.1136/bmjopen-2021-056927 (PMC8808383; doi:10.1136/bmjopen-2021-056927), 2022-01-31
Supplement: bmjopen-2021-056927supp002.pdf [file bmjopen-2021-056927supp002.pdf]

## Appendix 2: PRISMA flow Diagram:

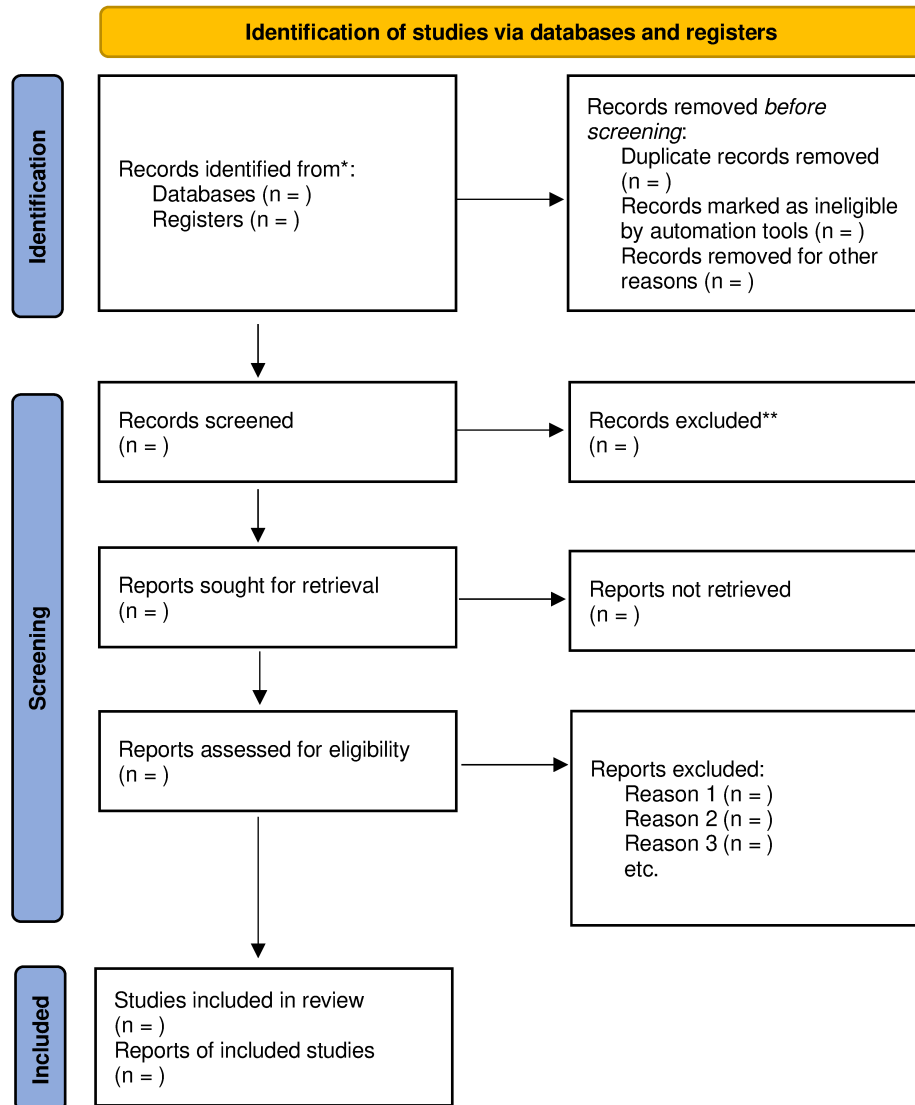

From: Page MJ, McKenzie JE, Bossuyt PM, Boutron I, Hoffmann TC, Mulrow CD, et al. The PRISMA 2020 statement: an updated guideline for reporting systematic reviews. *BMJ* 2021;372:n71. doi: 10.1136/bmj.n71
